# Supplementary material for: A Novel Corn-Expressed Phytase Improves Daily Weight Gain, Protein Efficiency Ratio and Nutrients Digestibility and Alters Fecal Microbiota in Pigs Fed with Very Low Protein Diets
Source: MDPI journal article supplement (doi:10.3390/ani10101926), 2020-10-20
Supplement: s1 [file s1]

Article

# A Novel Corn-Expressed Phytase Improves Daily Weight Gain, Protein Efficiency Ratio and Nutrients Digestibility and Alters Fecal Microbiota in Pigs Fed with Very Low Protein Diets

Cedrick N. Shili, Jonathan N. Broomhead, Shelby C. Spring and Mike B. Lanahan and Adel Pezeshki

## Supplementary Figures

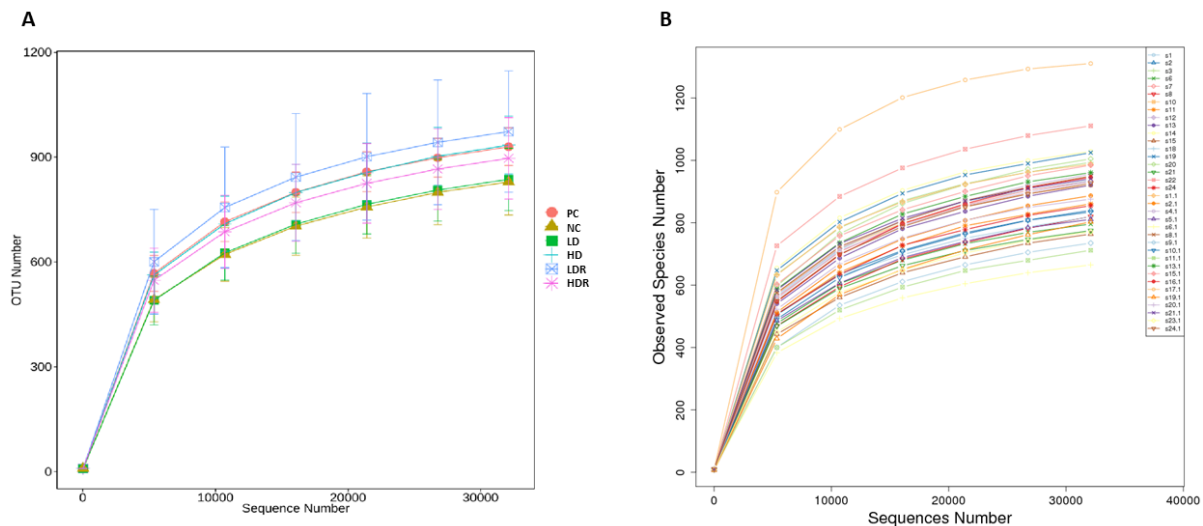

**Figure S1.** Fecal rarefaction curve analysis for pigs fed with low-protein diets supplemented with a corn-expressed phytase. The rarefaction curves from fecal samples collected show the number of operational taxonomic units (OTU) found as a function of the number of reads sampled when data were analyzed based on (A) dietary groups and (B) individual pigs. Pigs are grouped based on their dietary treatments: PC (positive control): normal protein, adequate Ca and available

phosphorous (aP), no corn-expressed phytase (CEP) added; NC (negative control): low protein, adequate Ca and aP, no CEP added; LD: NC + CEP added at low dose, i.e. 2,000 FTU/kg of diet; HD: NC + CEP added at high dose, i.e. 4,000 FTU/kg of diet; LDR: LD with reduced calcium (Ca) and phosphorus (P); HDR: HD with reduced Ca and P. Each line represents an individual pig.  $n = 6$  for each dietary group.

**Table S1.** Digestibility of calcium, phosphorous and nitrogen of pigs fed with low-protein diets supplemented with a corn-expressed phytase.

|                      | Diets <sup>1</sup>         |                            |                             |                           |                            |                            | SEM <sup>2</sup> | <i>p</i> - value |
|----------------------|----------------------------|----------------------------|-----------------------------|---------------------------|----------------------------|----------------------------|------------------|------------------|
|                      | PC                         | NC                         | LD                          | HD                        | LDR                        | HDR                        |                  |                  |
| <b>Calcium</b>       |                            |                            |                             |                           |                            |                            |                  |                  |
| AFD <sup>3</sup> , % | 65.59 ± 10.34 <sup>a</sup> | 67.38 ± 8.39 <sup>ab</sup> | 75.71 ± 7.94 <sup>abc</sup> | 80.82 ± 5.23 <sup>c</sup> | 76.03 ± 4.68 <sup>bc</sup> | 80.97 ± 8.53 <sup>c</sup>  | 1.41             | < 0.01           |
| <b>Phosphorus</b>    |                            |                            |                             |                           |                            |                            |                  |                  |
| AFD <sup>3</sup> , % | 55.95 ± 9.05 <sup>a</sup>  | 62.21 ± 9.82 <sup>ab</sup> | 69.90 ± 9.55 <sup>bcd</sup> | 80.21 ± 4.44 <sup>d</sup> | 69.42 ± 6.63 <sup>bd</sup> | 75.87 ± 7.04 <sup>cd</sup> | 1.67             | < 0.01           |
| <b>Nitrogen</b>      |                            |                            |                             |                           |                            |                            |                  |                  |
| AFD <sup>3</sup> , % | 80.42 ± 6.32               | 74.50 ± 9.99               | 78.61 ± 4.83                | 82.23 ± 3.74              | 73.98 ± 8.53               | 77.70 ± 7.57               | 1.11             | 0.22             |

<sup>1</sup>PC (positive control): normal protein, adequate Ca and available phosphorous (aP), no corn-expressed phytase (CEP) added; NC (negative control): low protein, adequate Ca and aP, no CEP added; LD: NC + CEP added at a low dose, i.e. 2,000 FTU/kg of diet; HD: NC + CEP added at high dose, i.e. 4,000 FTU/kg of diet; LDR: LD with reduced calcium (Ca) and phosphorus (P); HDR: HD with reduced Ca and P. Values are means ± standard deviations.  $n = 8$  for each dietary group. <sup>2</sup>SEM: standard errors of means; <sup>3</sup>AFD: apparent fecal digestibility; <sup>a-d</sup> Within a row, values without a common superscript letter differ ( $p \leq 0.05$ ).
